# Supplementary material
Source: PubMed Central journal article supplement (PMC9360444)
Supplement: 41467_2022_32248_MOESM1_ESM.pdf [file 41467_2022_32248_MOESM1_ESM.pdf]

1 SUPPLEMENTARY DATA

2  
3 **ChAdOx1 nCoV-19 (AZD1222) or ChAdOx1 nCoV-19-Beta (AZD2816) protect Syrian hamsters**  
4 **against the Beta, Delta, and Omicron variants of concern**

5 Neeltje van Doremalen<sup>1\*</sup>, Jonathan E. Schulz<sup>1</sup>, Danielle R. Adney<sup>1#</sup>, Taylor A. Saturday<sup>1</sup>, Robert J.  
6 Fischer<sup>1</sup>, Claude Kwe Yinda<sup>1</sup>, Nazia Thakur<sup>2,3</sup>, Joseph Newman<sup>2</sup>, Marta Ulaszewska<sup>3</sup>, Sandra Belij-  
7 Rammerstorfer<sup>3</sup>, Greg Saturday<sup>4</sup>, Alexandra J. Spencer<sup>3</sup>, Dalan Bailey<sup>2</sup>, Colin A. Russell<sup>5</sup>, Sarah C.  
8 Gilbert<sup>3</sup>, Teresa Lambe<sup>6</sup>, Vincent J. Munster<sup>1\*</sup>

9  
10 1. *Laboratory of Virology, National Institute of Allergy and Infectious Diseases, National*  
11 *Institutes of Health, Hamilton, MT, USA.*

12 2. *Viral Glycoproteins Group, The Pirbright Institute, Pirbright, Woking, UK*

13 3. *Pandemic Sciences Institute, Nuffield Department of Medicine, University of Oxford,*  
14 *Oxford, UK*

15 4. *Rocky Mountain Veterinary Branch, National Institute of Allergy and Infectious*  
16 *Diseases, National Institutes of Health, Hamilton, MT, USA*

17 5. *Laboratory of Applied Evolutionary Biology, Department of Medical Microbiology,*  
18 *Academic Medical Center, University of Amsterdam, Amsterdam, The Netherlands*

19 6. *Oxford Vaccine Group, Department of Paediatrics, University of Oxford, Oxford, UK*  
20 *and Chinese Academy of Medical Science (CAMS) Oxford Institute (COI), University of*  
21 *Oxford, Oxford, UK*

22 \* = *corresponding authors*

23 # *Current affiliation = Lovelace Biomedical Research Institute, Department of Comparative*  
24 *Medicine, Albuquerque, NM, United States of America*

25

26 **Supplementary Table 1. Pathological scoring of lung tissue samples.** The tissue slides were examined  
 27 by a board-certified veterinary anatomic pathologist blinded to study group allocations. Scoring was done  
 28 as follows. H&E; no lesions = 0; less than 1% = 0.5; minimal (1-10%) = 1; mild (11-25%) = 2; moderate  
 29 (26-50%) = 3; marked (51-75%) = 4; severe (76-100%) = 5. IHC attachment; none = 0; less than 1% =  
 30 0.5; rare/few (1-10%) = 1; scattered (11-25%) = 2; moderate (26-50%) = 3; numerous (51-75%) = 4;  
 31 diffuse (76-100%) = 5.  
 32

| Beta VoC challenge  |     |            |                        |               |                |                           |                        |
|---------------------|-----|------------|------------------------|---------------|----------------|---------------------------|------------------------|
| Group               | Day | H&E        |                        |               | IHC            |                           |                        |
|                     |     | % affected | Interstitial pneumonia | Bronchiolitis | % distribution | Type I and II pneumocytes | Bronchiolar epithelium |
| AZD2816             | 3   | 0          | 0                      | 0             | 0              | 0                         | 0                      |
|                     |     | 0          | 0                      | 0             | 0              | 0                         | 0                      |
|                     |     | 0          | 0                      | 0             | 0              | 0                         | 0                      |
|                     |     | 0          | 0                      | 0             | 0              | 0                         | 0                      |
|                     |     | 0          | 0                      | 0             | 0              | 0                         | 0                      |
|                     | 5   | 0          | 0                      | 0             | 0              | 0                         | 0                      |
|                     |     | 0          | 0                      | 0             | 0              | 0                         | 0                      |
|                     |     | 0.5        | 1                      | 0             | 0              | 0                         | 0                      |
|                     |     | 0          | 0                      | 0             | 0              | 0                         | 0                      |
|                     |     | 0          | 0                      | 2             | 0              | 0                         | 0                      |
| AZD1222+ AZD2816    | 3   | 0          | 0                      | 0             | 0              | 0                         | 0                      |
|                     |     | 0.5        | 0                      | 2             | 0.5            | 0                         | 3                      |
|                     |     | 0          | 0                      | 0             | 0              | 0                         | 0                      |
|                     |     | 0          | 0                      | 0             | 0              | 0                         | 0                      |
|                     |     | 0.5        | 0                      | 1             | 0.5            | 1                         | 3                      |
|                     | 5   | 0          | 0                      | 0             | 0.5            | 0                         | 2                      |
|                     |     | 0          | 0                      | 0             | 0              | 0                         | 0                      |
|                     |     | 0.5        | 1                      | 0             | 0.5            | 1                         | 2                      |
|                     |     | 0.5        | 1                      | 0             | 0              | 0                         | 0                      |
|                     |     | 0.5        | 1                      | 0             | 0              | 0                         | 0                      |
| Control             | 3   | 0.5        | 0                      | 1             | 0.5            | 2                         | 4                      |
|                     |     | 0.5        | 1                      | 1             | 0.5            | 2                         | 4                      |
|                     |     | 0.5        | 0                      | 2             | 0.5            | 2                         | 4                      |
|                     |     | 0.5        | 0                      | 1             | 0.5            | 2                         | 4                      |
|                     |     | 0          | 0                      | 0             | 0.5            | 2                         | 4                      |
|                     | 5   | 0.5        | 0                      | 2             | 0.5            | 2                         | 4                      |
|                     |     | 40         | 3                      | 1             | 40             | 4                         | 2                      |
|                     |     | 40         | 3                      | 2             | 40             | 4                         | 3                      |
|                     |     | 30         | 3                      | 2             | 50             | 4                         | 3                      |
|                     |     | 40         | 3                      | 2             | 30             | 4                         | 3                      |
| Delta VoC challenge | 3   | 0.5        | 0                      | 1             | 0.5            | 1                         | 2                      |
|                     |     | 0.5        | 0                      | 1             | 0.5            | 0                         | 3                      |
|                     |     | 0.5        | 0                      | 3             | 0.5            | 1                         | 4                      |
|                     |     | 0.5        | 0                      | 2             | 0.5            | 1                         | 3                      |
|                     |     | 0.5        | 1                      | 0             | 0.5            | 1                         | 1                      |
|                     | 5   | 0.5        | 0                      | 2             | 0.5            | 0                         | 2                      |
|                     |     | 0          | 0                      | 0             | 0              | 0                         | 0                      |
|                     |     | 0          | 0                      | 0             | 0              | 0                         | 0                      |
|                     |     | 0          | 1                      | 0             | 0              | 0                         | 0                      |
|                     |     | 0.5        | 0                      | 0             | 0              | 0                         | 0                      |

|                       |   |     |    |     |     |   |   |
|-----------------------|---|-----|----|-----|-----|---|---|
|                       |   | 0   | 0  | 0   | 0   | 0 | 0 |
|                       |   | 0   | 0  | 0   | 0   | 0 | 0 |
| AZD1222+<br>AZD2816   | 3 | 0   | 0  | 0   | 0.5 | 0 | 2 |
|                       |   | 0   | 0  | 1   | 0.5 | 1 | 4 |
|                       |   | 0   | 0  | 0   | 0.5 | 0 | 4 |
|                       |   | 0   | 0  | 0   | 0.5 | 1 | 2 |
|                       |   | 0.5 | 0  | 1   | 0.5 | 1 | 2 |
|                       | 0 | 0   | 0  | 0.5 | 0   | 1 |   |
|                       | 5 | 0   | 0  | 0   | 0   | 0 | 0 |
|                       |   | 0   | 0  | 0   | 0   | 0 | 0 |
|                       |   | 0   | 0  | 0   | 0   | 0 | 0 |
|                       |   | 10  | 2  | 0   | 0.5 | 1 | 0 |
| 0                     |   | 0   | 0  | 0   | 0   | 0 |   |
| Control               | 3 | 0.5 | 0  | 3   | 0.5 | 2 | 4 |
|                       |   | 0.5 | 0  | 3   | 0.5 | 2 | 4 |
|                       |   | 0.5 | 0  | 3   | 0.5 | 2 | 4 |
|                       |   | 0.5 | 0  | 3   | 0.5 | 2 | 4 |
|                       |   | 0.5 | 0  | 3   | 0.5 | 2 | 4 |
|                       | 5 | 40  | 3  | 2   | 30  | 4 | 2 |
|                       |   | 40  | 3  | 2   | 30  | 4 | 2 |
|                       |   | 40  | 3  | 2   | 20  | 4 | 2 |
|                       |   | 50  | 3  | 2   | 30  | 4 | 2 |
|                       |   | 40  | 3  | 2   | 10  | 3 | 2 |
| 40                    | 3 | 2   | 30 | 4   | 2   |   |   |
| Omicron VoC challenge |   |     |    |     |     |   |   |
| AZD2816               | 3 | 0   | 0  | 0   | 0   | 0 | 0 |
|                       |   | 0   | 0  | 0   | 0   | 0 | 0 |
|                       |   | 0   | 0  | 0   | 0.5 | 0 | 1 |
|                       |   | 0   | 0  | 0   | 0   | 0 | 0 |
|                       | 5 | 0   | 0  | 0   | 0   | 0 | 0 |
|                       |   | 0   | 0  | 0   | 0   | 0 | 0 |
|                       |   | 0.5 | 1  | 0   | 0   | 0 | 0 |
|                       |   | 0   | 0  | 0   | 0   | 0 | 0 |
| AZD1222               | 3 | 0   | 0  | 0   | 0.5 | 0 | 1 |
|                       |   | 0   | 0  | 0   | 0.5 | 0 | 1 |
|                       |   | 0   | 0  | 0   | 0.5 | 2 | 2 |
|                       | 5 | 0.5 | 0  | 1   | 0.5 | 0 | 1 |
|                       |   | 0   | 0  | 0   | 0   | 0 | 0 |
|                       |   | 0.5 | 1  | 0   | 0   | 0 | 0 |
|                       |   | 0   | 0  | 0   | 0   | 0 | 0 |
| Control               | 3 | 0   | 0  | 0   | 0.5 | 0 | 3 |
|                       |   | 0   | 0  | 0   | 0   | 0 | 0 |
|                       |   | 0.5 | 0  | 1   | 0.5 | 0 | 3 |
|                       |   | 0.5 | 0  | 1   | 0.5 | 0 | 3 |
|                       | 5 | 0   | 0  | 0   | 0.5 | 0 | 1 |
|                       |   | 0   | 0  | 0   | 0.5 | 0 | 1 |
|                       |   | 0.5 | 0  | 1   | 0.5 | 1 | 2 |
| 0                     | 0 | 0   | 0  | 0   | 0   |   |   |
| Ancestral challenge   |   |     |    |     |     |   |   |
| AZD1222               | 3 | 0.5 | 0  | 1   | 0.5 | 1 | 3 |
|                       |   | 0   | 0  | 0   | 0.5 | 0 | 1 |
|                       |   | 0.5 | 0  | 2   | 0.5 | 0 | 2 |
|                       |   | 0.5 | 0  | 2   | 0.5 | 0 | 3 |
|                       | 5 | 0.5 | 1  | 0   | 0   | 0 | 0 |
|                       |   | 10  | 1  | 0   | 0.5 | 1 | 0 |
|                       |   | 0   | 0  | 0   | 0   | 0 | 0 |

|         |   |     |   |   |     |   |   |
|---------|---|-----|---|---|-----|---|---|
|         |   | 0.5 | 1 | 1 | 0   | 0 | 0 |
| Control | 3 | 0.5 | 1 | 3 | 10  | 3 | 4 |
|         |   | 0.5 | 1 | 2 | 10  | 3 | 4 |
|         |   | 0.5 | 1 | 3 | 10  | 3 | 4 |
|         |   | 0.5 | 0 | 3 | 0.5 | 2 | 4 |
|         |   | 50  | 3 | 2 | 60  | 4 | 1 |
|         | 5 | 50  | 3 | 2 | 40  | 4 | 2 |
|         |   | 40  | 3 | 2 | 40  | 4 | 3 |

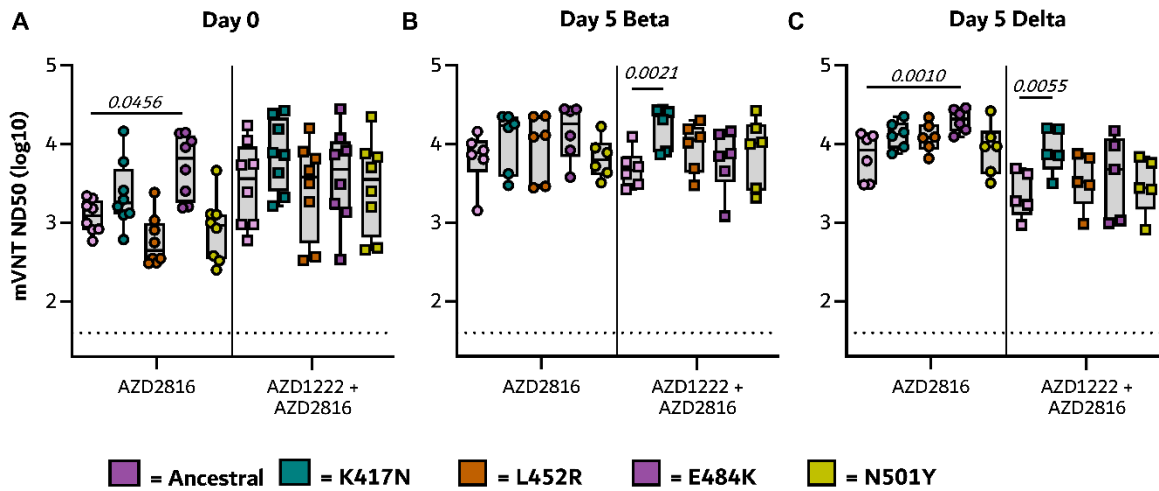

35

36

37 **Supplementary Figure 1. Humoral response of vaccinated hamsters against single mutant**  
 38 **pseudotypes.** Boxplots (minimum to maximum) of binding antibody titers as measured by pseudovirus  
 39 VN titers in hamster sera obtained on day 0 (left panel), day 5 after Beta VoC challenge (middle panel),  
 40 and day 5 after Delta VoC challenge (right panel). Statistical significance was determined via a Friedman  
 41 test followed by Dunn's multiple comparisons test comparing ancestral against mutant, p-values in italic  
 42 when significant. N=6 per group, day 5 Delta prime boost group N=5. All boxplots are drawn from first  
 43 quartile to third quartile, with a line at the median. Whiskers go from each quartile to minimum or  
 44 maximum values. Source data are provided as a Source Data file.

45

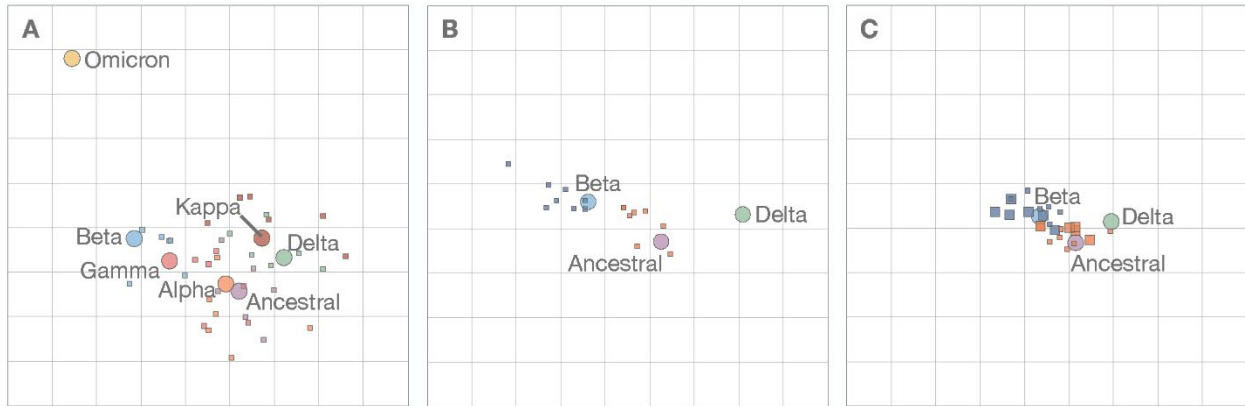

46  
 47 **Supplementary Figure 2. Antigenic map using live VN assays.** Multidimensional scaling was used to  
 48 make maps showing the antigenic distance between different antigens and sera obtained from hamsters,  
 49 based on live VN titers. (A) Mapping of live VN titers of sera obtained from hamsters challenged with  
 50 ancestral virus, Alpha, Beta, Gamma, Kappa, Delta, or Omicron VoCs against the same VoCs. Antigens  
 51 are shown as circles, sera is shown as squares. Sera is color-matched against antigen, e.g. sera obtained  
 52 from hamsters challenged with the Beta VoC is blue. (B) Mapping of live VN titers of sera obtained from  
 53 vaccinated hamsters at 0 days post challenge against ancestral virus, Beta, or Delta VoCs. Blue squares =  
 54 AZD2816-vaccinated hamsters; Orange squares = AZD1222+AZD2816-vaccinated hamsters. (C)  
 55 Mapping of live VN titers of sera obtained from vaccinated hamsters at 5 days post challenge against  
 56 ancestral virus, Beta, or Delta VoCs. Blue squares = AZD2816-vaccinated hamsters; Orange squares =  
 57 AZD1222+AZD2816-vaccinated hamsters; Large squares = hamsters challenged with Beta VoC; Small  
 58 squares = hamsters challenged with Delta VoC. Source data are provided as a Source Data file.

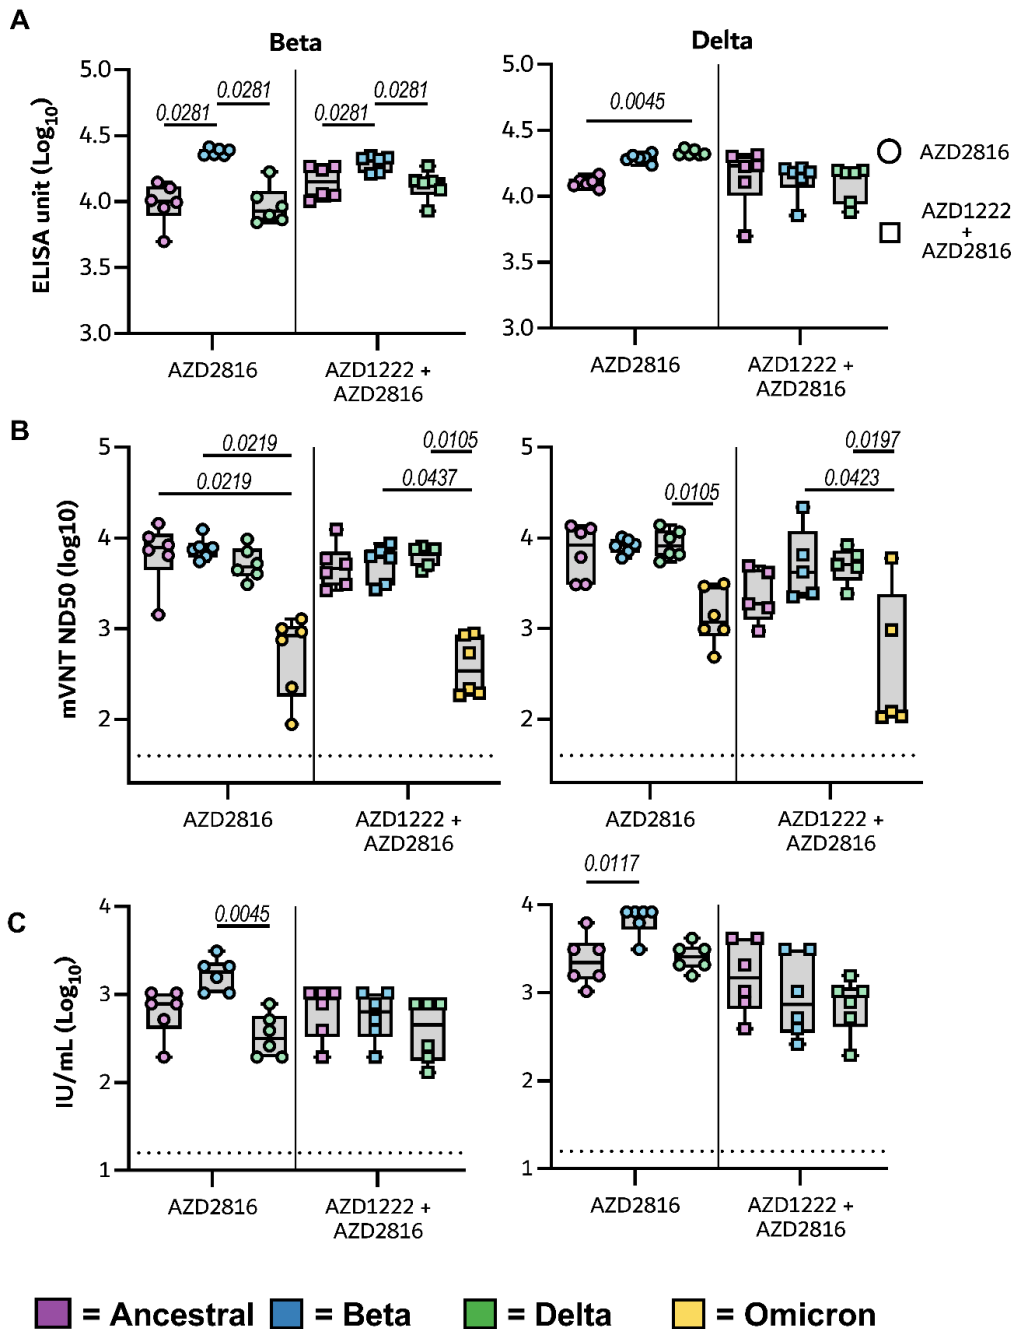

59  
60 **Supplementary Figure 3. Humoral response of vaccinated hamsters upon challenge with the Beta**  
61 **(left panels) or Delta (right panels) VoC.** Boxplots (minimum to maximum) of binding antibody titers  
62 as measured by ELISA (A), pseudovirus VN titers (B), and live virus VN titers (C) in hamster sera  
63 obtained on day 5. Statistical significance was determined via a Friedman test followed by Dunn's  
64 multiple comparisons test, p-values in italic when significant. N=6 per group, N=5 for pseudovirus VN  
65 after Delta challenge. All boxplots are drawn from first quartile to third quartile, with a line at the median.  
66 Whiskers go from each quartile to minimum or maximum values. Source data are provided as a Source  
67 Data file.

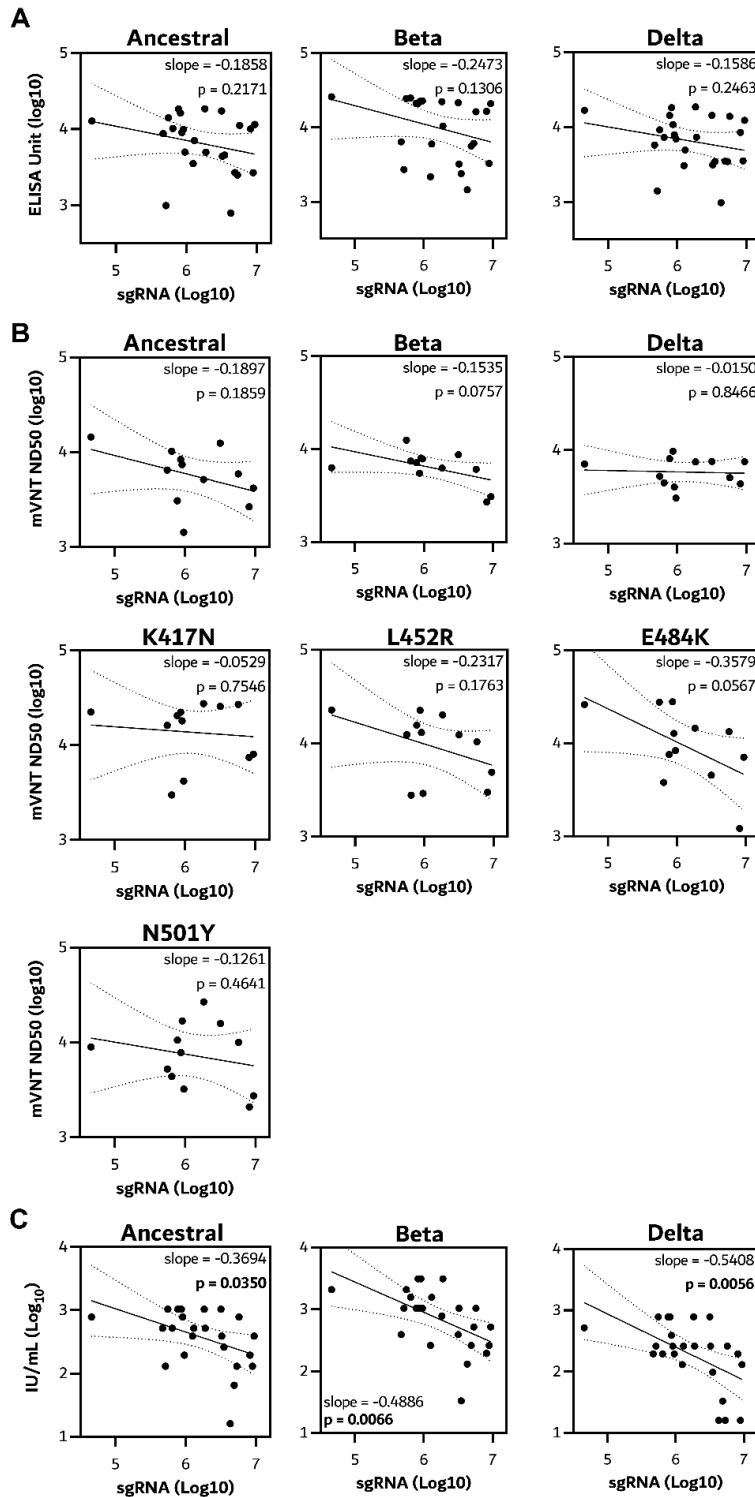

68  
 69 **Supplementary Figure 4. Linear correlation plots between sgRNA load in oropharyngeal swabs and**  
 70 **antibodies found in serum at day of necropsy post Beta challenge.** A) Binding antibodies as  
 71 determined via ELISA S. B) Pseudo VN titers. C) Live VN titers. Significance is calculated using simple  
 72 linear regression. Source data are provided as a Source Data file.





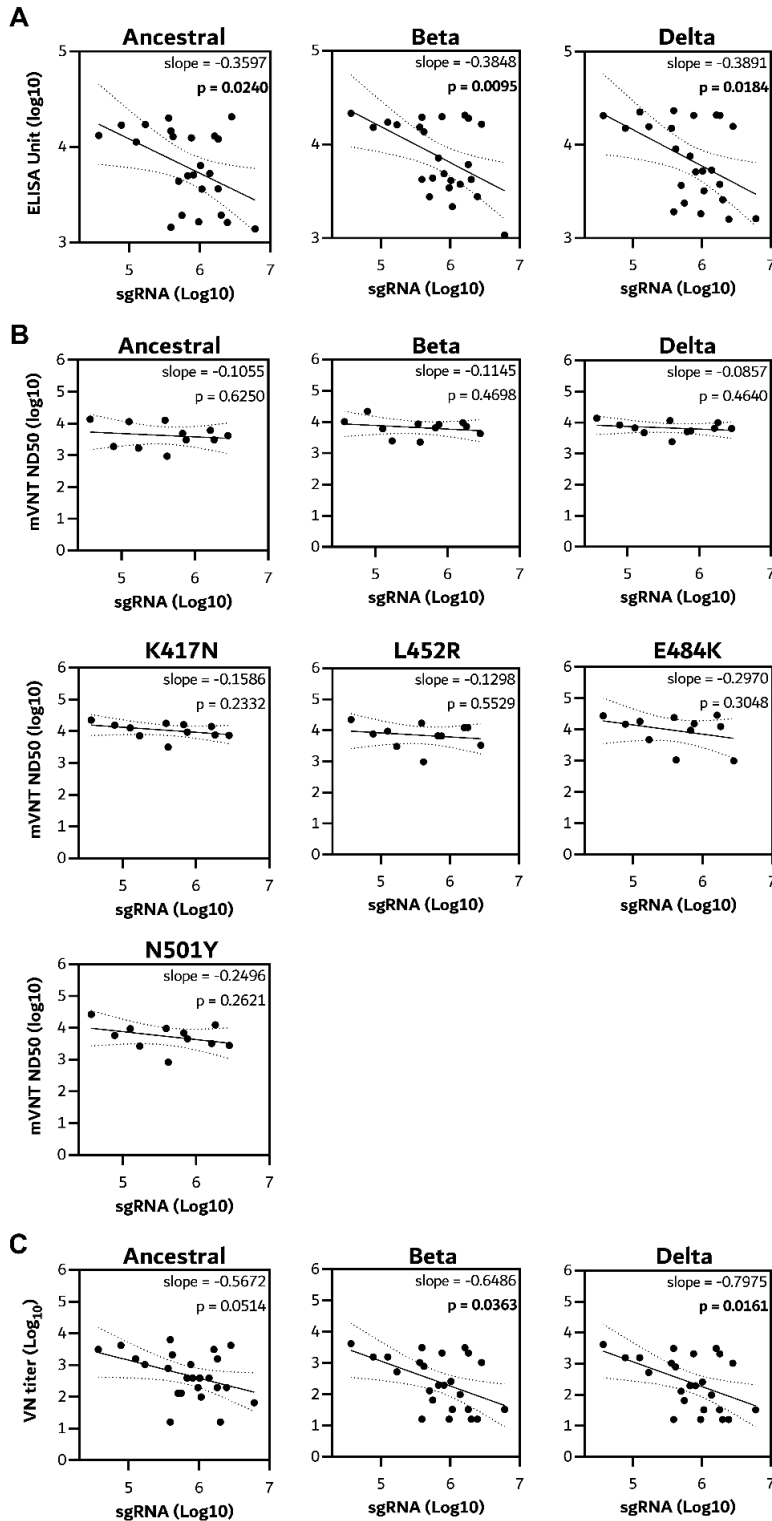

82  
 83 **Supplementary Figure 6. Linear correlation plots between sgRNA load in oropharyngeal swabs and**  
 84 **antibodies found in serum at day of necropsy post Delta challenge.** A) Binding antibodies against  
 85 Delta S. B) Pseudo VN titers against Delta. C) Live VN titers against the Delta variant. Significance is  
 86 calculated using simple linear regression. Source data are provided as a Source Data file.

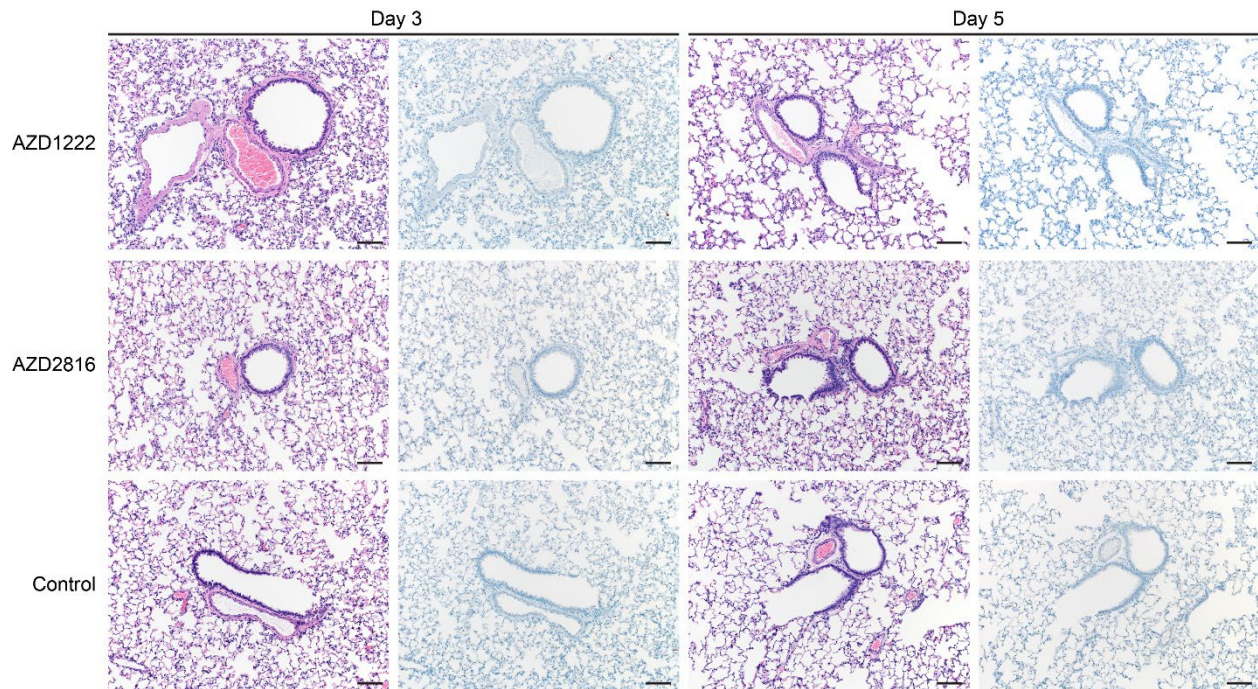

87  
88

89 **Supplementary Figure 7. Pulmonary effects of intranasal challenge with the Omicron VoC in**  
 90 **vaccinated and control hamsters at day 3 and 5.** H&E staining (1st and 3rd column) and IHC staining  
 91 against N protein (brown, 2nd and 4th column), 100x, scale bar = 100  $\mu$ m. N=4. Most vaccinated and  
 92 control animals showed no pathology in the lower respiratory tract, except for minimal interstitial  
 93 pneumonia on day 5 in 1/4 animals in each vaccine group. Antigen staining was limited to bronchial and  
 94 bronchiolar epithelium in 2/4 control animals on day 5 and 1/4 AZD1222 vaccinated animals on day 3, as  
 95 well as in type I and II pneumocytes in 1/4 animals in control animals on day 5.
